# Supplementary material for: Colorimetric and Electrochemical Dual-Mode Detection of Thioredoxin 1 Based on the Efficient Peroxidase-Mimicking and Electrocatalytic Property of Prussian Blue Nanoparticles
Source: MDPI journal article supplement (doi:10.3390/bios14040185), 2024-04-10
Supplement: s1 [file s1]

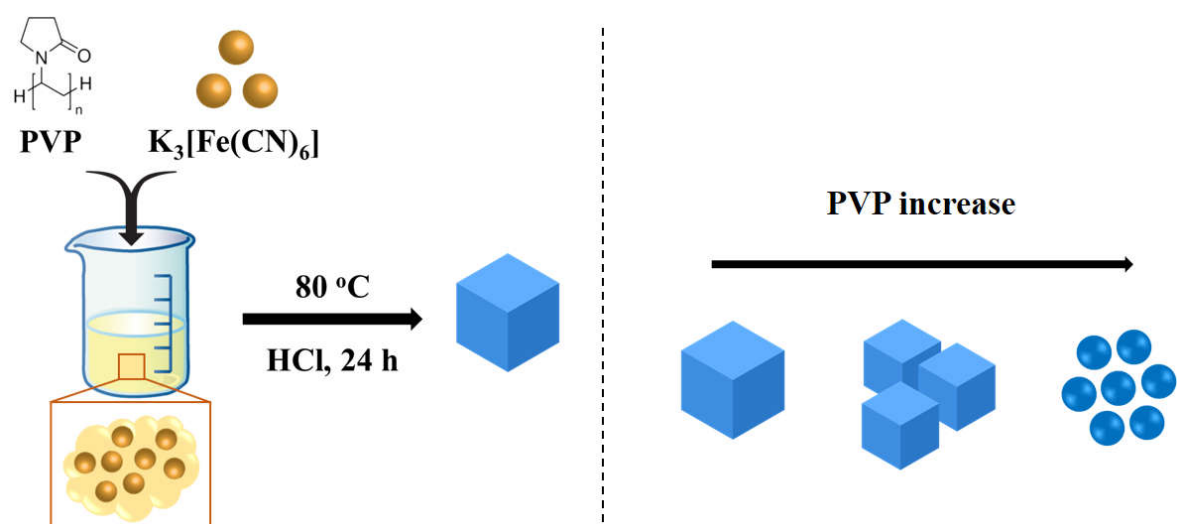

**Figure S1.** Schematic illustration for the synthesis of PBNPs having different sizes and morphologies.

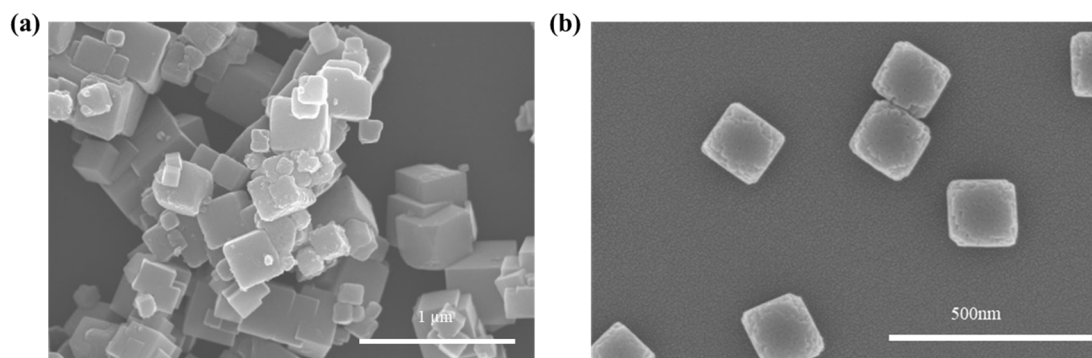

**Figure S2.** SEM images of PBNPs synthesized (a) in the absence and (b) presence of PVP.

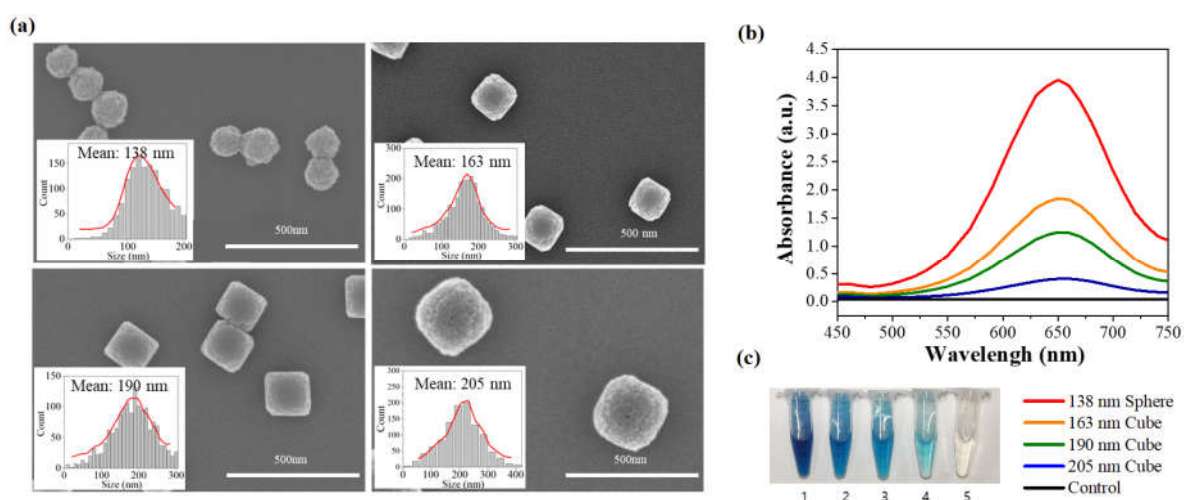

**Figure S3.** (a) SEM images and the statistical size analysis of PBNPs and (b) their absorption spectra for TMB oxidation in the presence of  $\text{H}_2\text{O}_2$  with (c) corresponding photographs.

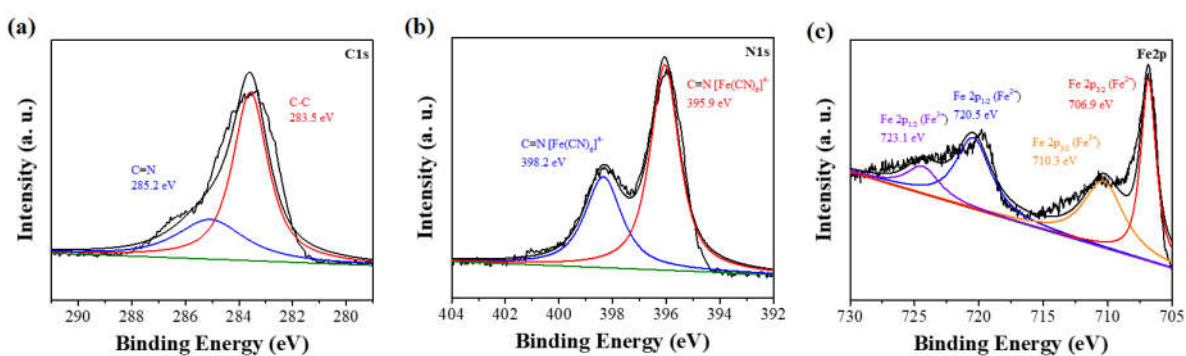

**Figure S4.** High-resolution XPS spectra for (a) C 1s, (b) N 1s, and (c) Fe 2p.

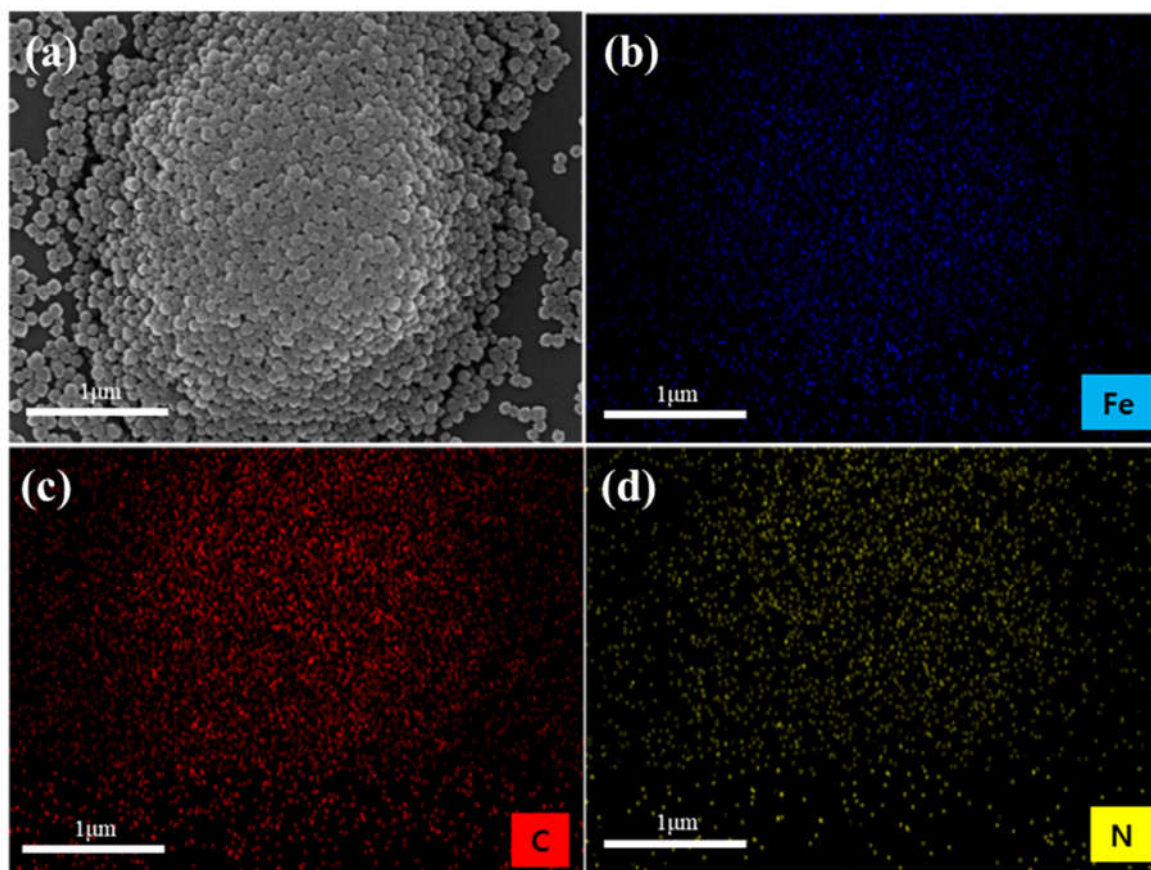

**Figure S5.** (a) SEM image and EDS maps of (b) Fe, (c) C, and (d) N of PBNPs.

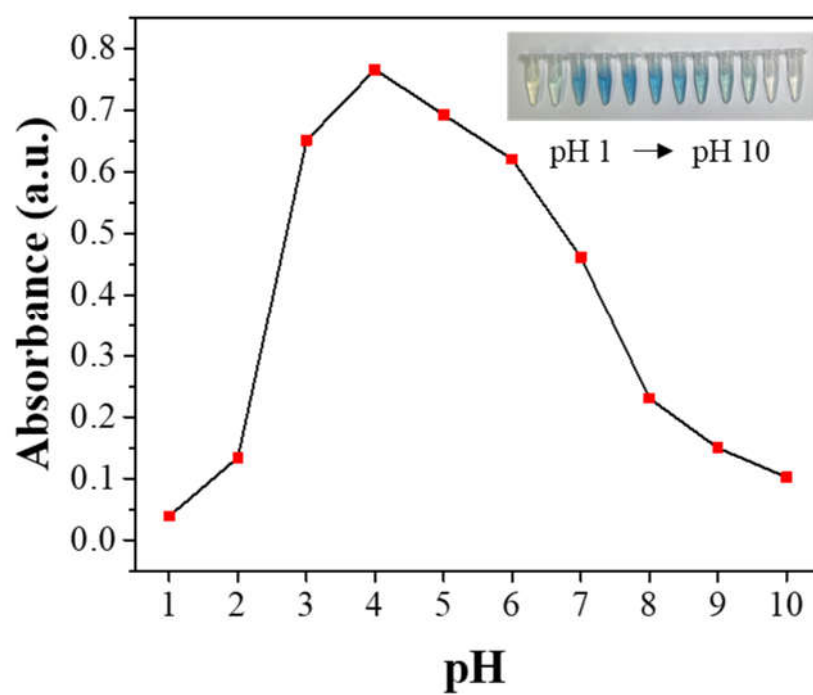

**Figure S6.** Effects of pH on the peroxidase-like activity of PBNPs.

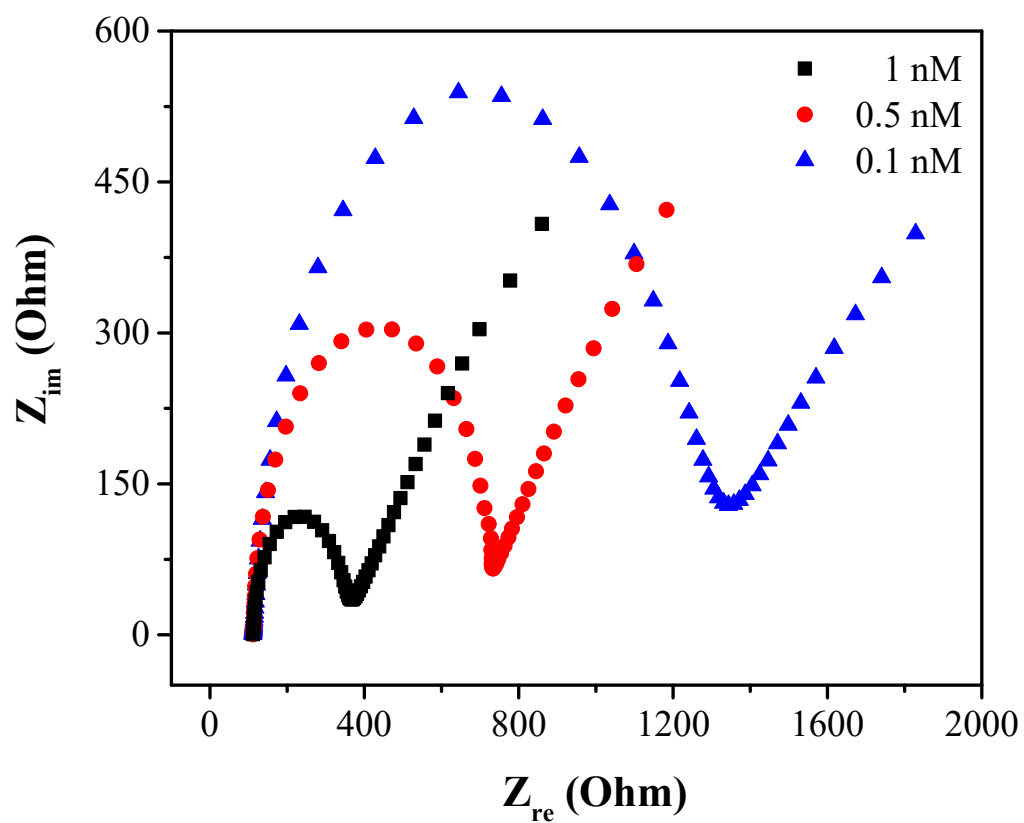

**Figure S7.** Nyquist impedance plots as a function of employed concentrations of PBNPs on the electrode.

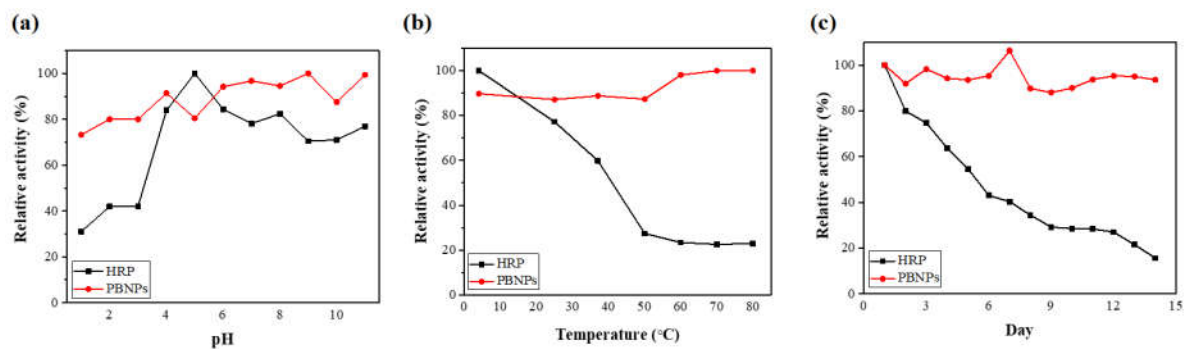

**Figure S8.** Comparison of stability in ranges of (a) pH, (b) temperature, and (c) storage time at RT.

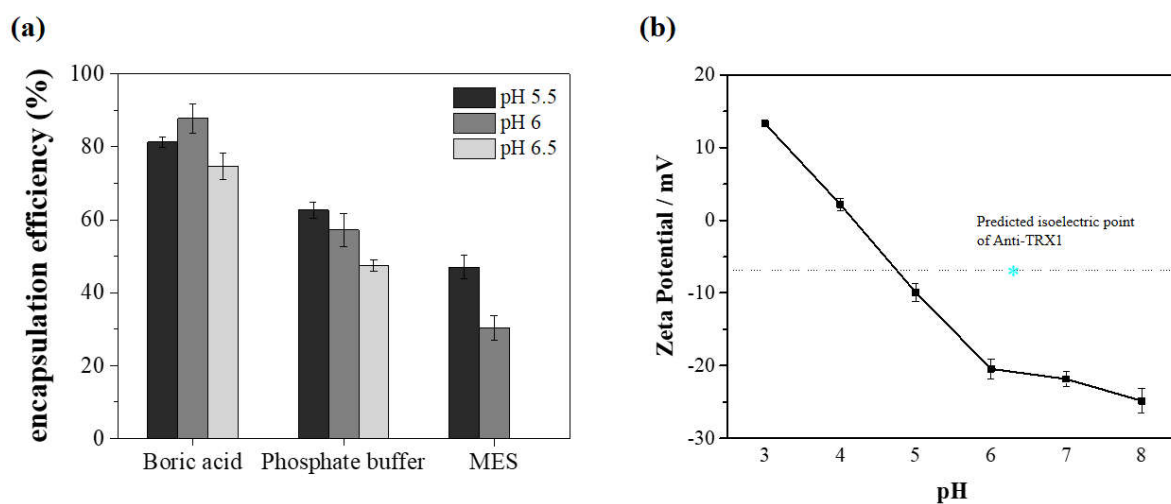

**Figure S9.** (a) Comparison of TRX1 antibody encapsulation efficiency in different buffers and pH conditions. (b) Zeta potential of PBNPs as a function of buffer pH with predicted isoelectric point of TRX1 antibody.

**Table S1.** Comparison of kinetic parameters of PBNPs with those of recent peroxidase-like nanozymes.

| Catalyst                       | K <sub>m</sub> (mM) |                               | V <sub>max</sub> (M s <sup>-1</sup> ) |                               | Ref.      |
|--------------------------------|---------------------|-------------------------------|---------------------------------------|-------------------------------|-----------|
|                                | TMB                 | H <sub>2</sub> O <sub>2</sub> | TMB                                   | H <sub>2</sub> O <sub>2</sub> |           |
| HRP                            | 0.434               | 3.7                           | 1.00 × 10 <sup>-7</sup>               | 8.70 × 10 <sup>-8</sup>       | [2]       |
| Fe <sub>3</sub> O <sub>4</sub> | 0.098               | 154                           | 3.44 × 10 <sup>-8</sup>               | 9.78 × 10 <sup>-8</sup>       | [2]       |
| Co <sub>3</sub> O <sub>4</sub> | 0.037               | 140                           | 6.27 × 10 <sup>-8</sup>               | 1.21 × 10 <sup>-7</sup>       | [3]       |
| 6Fe/CeO <sub>2</sub>           | 0.176               | 47.6                          | 8.60 × 10 <sup>-8</sup>               | 1.66 × 10 <sup>-7</sup>       | [4]       |
| Fe-MIL-88B-NH <sub>2</sub>     | 2.6                 | 1.3                           | 5.60 × 10 <sup>-8</sup>               | 2.50 × 10 <sup>-8</sup>       | [5]       |
| Fe-MOFs                        | 0.31                | 0.17                          | 4.00 × 10 <sup>-8</sup>               | 1.70 × 10 <sup>-8</sup>       | [6]       |
| MoS <sub>2</sub> -CPBNPs       | 0.22                | 3.17                          | 6.36 × 10 <sup>-8</sup>               | 1.49 × 10 <sup>-8</sup>       | [7]       |
| Cu@PB NCs                      | 0.6                 | 0.14                          | 1.79 × 10 <sup>-7</sup>               | 1.20 × 10 <sup>-7</sup>       | [8]       |
| PB NCs                         | 0.8                 | 1.58                          | 9.90 × 10 <sup>-8</sup>               | 9.70 × 10 <sup>-8</sup>       | [8]       |
| PBNPs                          | 0.363               | 1.4                           | 1.30 × 10 <sup>-7</sup>               | 2.46 × 10 <sup>-7</sup>       | This work |

## References

1. Lee, M.J.; Lee, E.S.; Kim, T.H.; Jeon, J.W.; Kim, Y.; Oh, B.K. Detection of thioredoxin-1 using ultra-sensitive ELISA with enzyme-encapsulated human serum albumin nanoparticle. *Nano Converg.* 2019, 6, 1-7.
2. Gao, L.; Zhuang, J.; Nie, L.; Zhang, J.; Zhang, Y.; Gu, N.; Wang, T.; Feng, J.; Yang, D.; Perrett, S.; et al. Intrinsic peroxidase-like activity of ferromagnetic nanoparticles. *Nat. Nanotechnol.* 2007, 2, 577-583.
3. Mu, J.; Wang, Y.; Zhao, M.; Zhang, L. Intrinsic peroxidase-like activity and catalase-like activity of Co<sub>3</sub>O<sub>4</sub> nanoparticles. *Chem. Commun.* 2012, 48, 2540-2542.
4. Jampaiah, D.; Reddy, T.S.; Kandjani, A.E.; Selvakannan, P.; Sabri, Y.M.; Coyle, V.E.; Shukla, R.; Bhargava, S.K. Fe-doped CeO<sub>2</sub> nanorods for enhanced peroxidase-like activity and their application towards glucose detection. *J. Mat. Chem. B* 2016, 4, 3874-3885.
5. Xu, W.; Jiao, L.; Yan, H.; Wu, Y.; Chen, L.; Gu, W.; Du, D.; Lin, Y.; Zhu, C. Glucose oxidase-integrated metal-organic framework hybrids as biomimetic cascade nanozymes for ultrasensitive glucose biosensing. *ACS Appl. Mater. Interfaces* 2019, 11, 22096-22101.
6. Chen, J.; Gao, H.; Li, Z.; Li, Y.; Yuan, Q. Ferriporphyrin-inspired MOFs as an artificial metalloenzyme for highly sensitive detection of H<sub>2</sub>O<sub>2</sub> and glucose. *Chin. Chem. Lett.* 2020, 31, 1398-1401.
7. Zhu, Z.; Gong, L.; Miao, X.; Chen, C.; Su, S. Prussian Blue Nanoparticle Supported MoS<sub>2</sub> Nanocomposites as a Peroxidase-Like Nanozyme for Colorimetric Sensing of Dopamine. *Biosensors* 2022, 12, 260.
8. Fan, S.; Jiang, X.; Yang, M.; Wang, X. Sensitive colorimetric assay for the determination of alkaline phosphatase activity utilizing nanozyme based on copper nanoparticle-modified Prussian blue. *Anal. Bioanal. Chem.* 2021, 413, 3955-3963.
